# Supplementary material for: Mechanism of cis-Nerolidol-Induced Bladder Carcinoma Cell Death
Source: MDPI journal article supplement (doi:10.3390/cancers15030981), 2023-02-03

# **Mechanism of *Cis*-Nerolidol-Induced Bladder Carcinoma Cell Death**

Raw blots

Figure S1 C

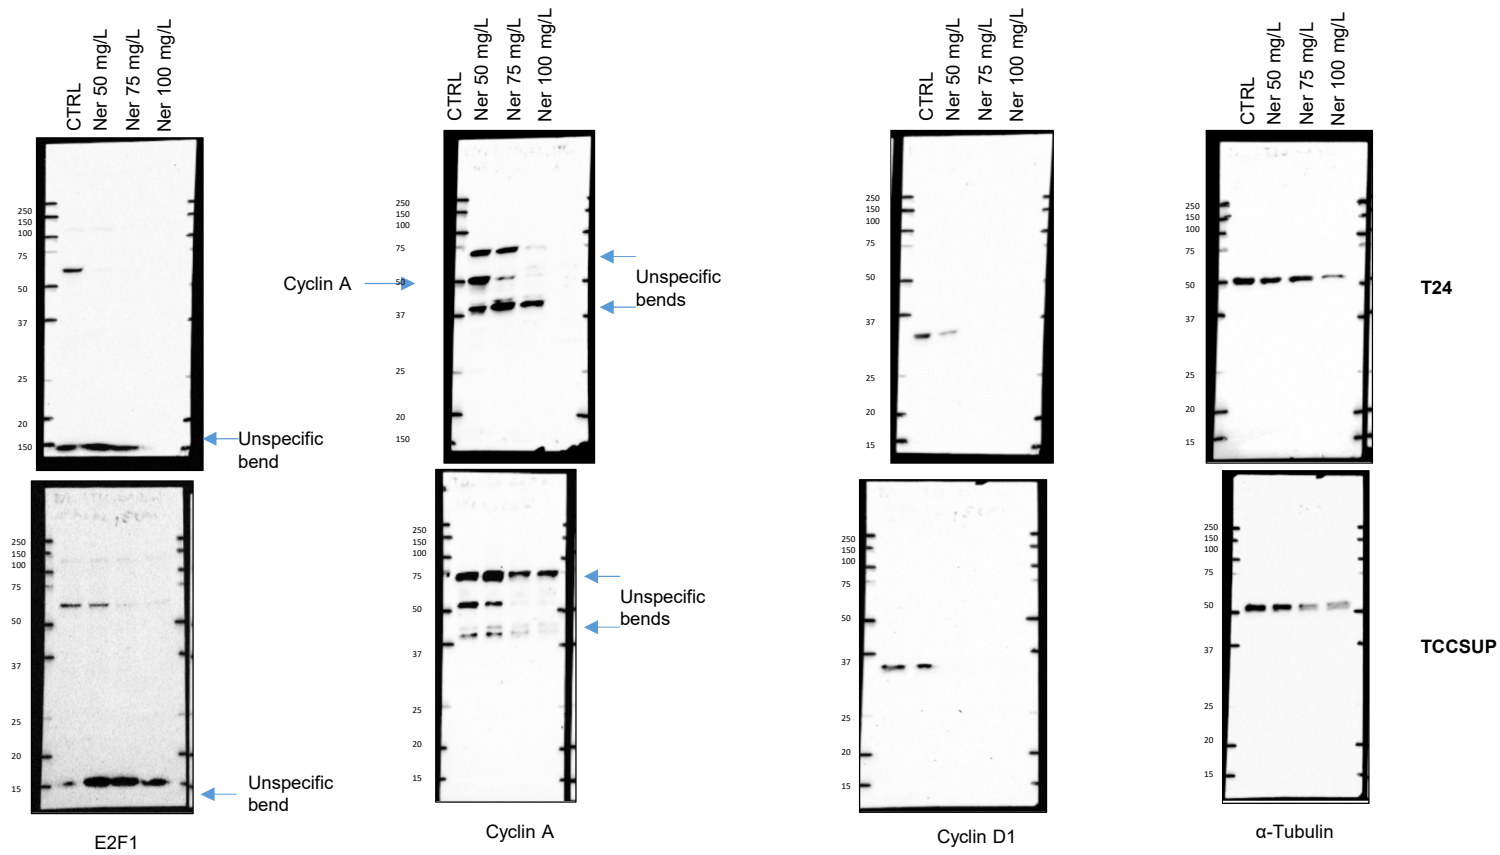

Figure S1 D

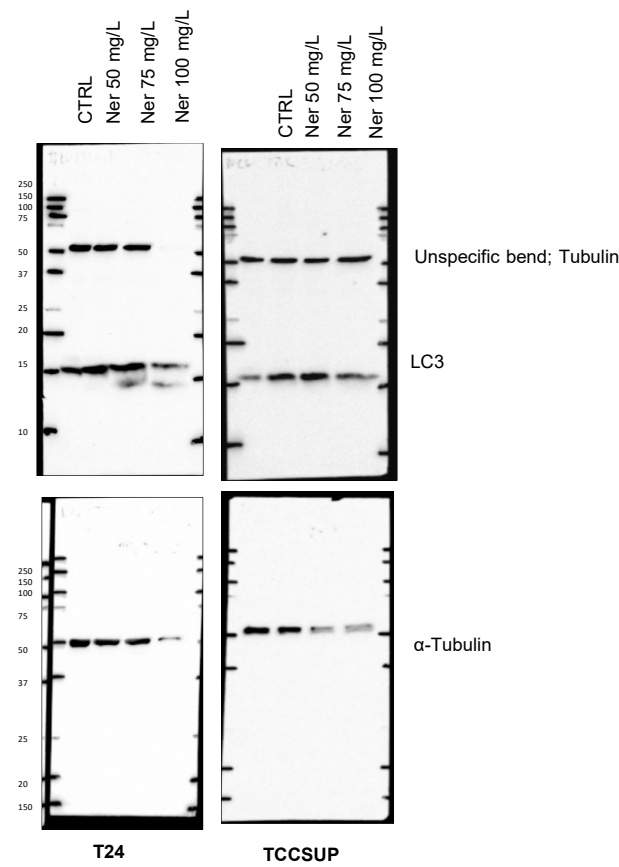

Figure S2 A

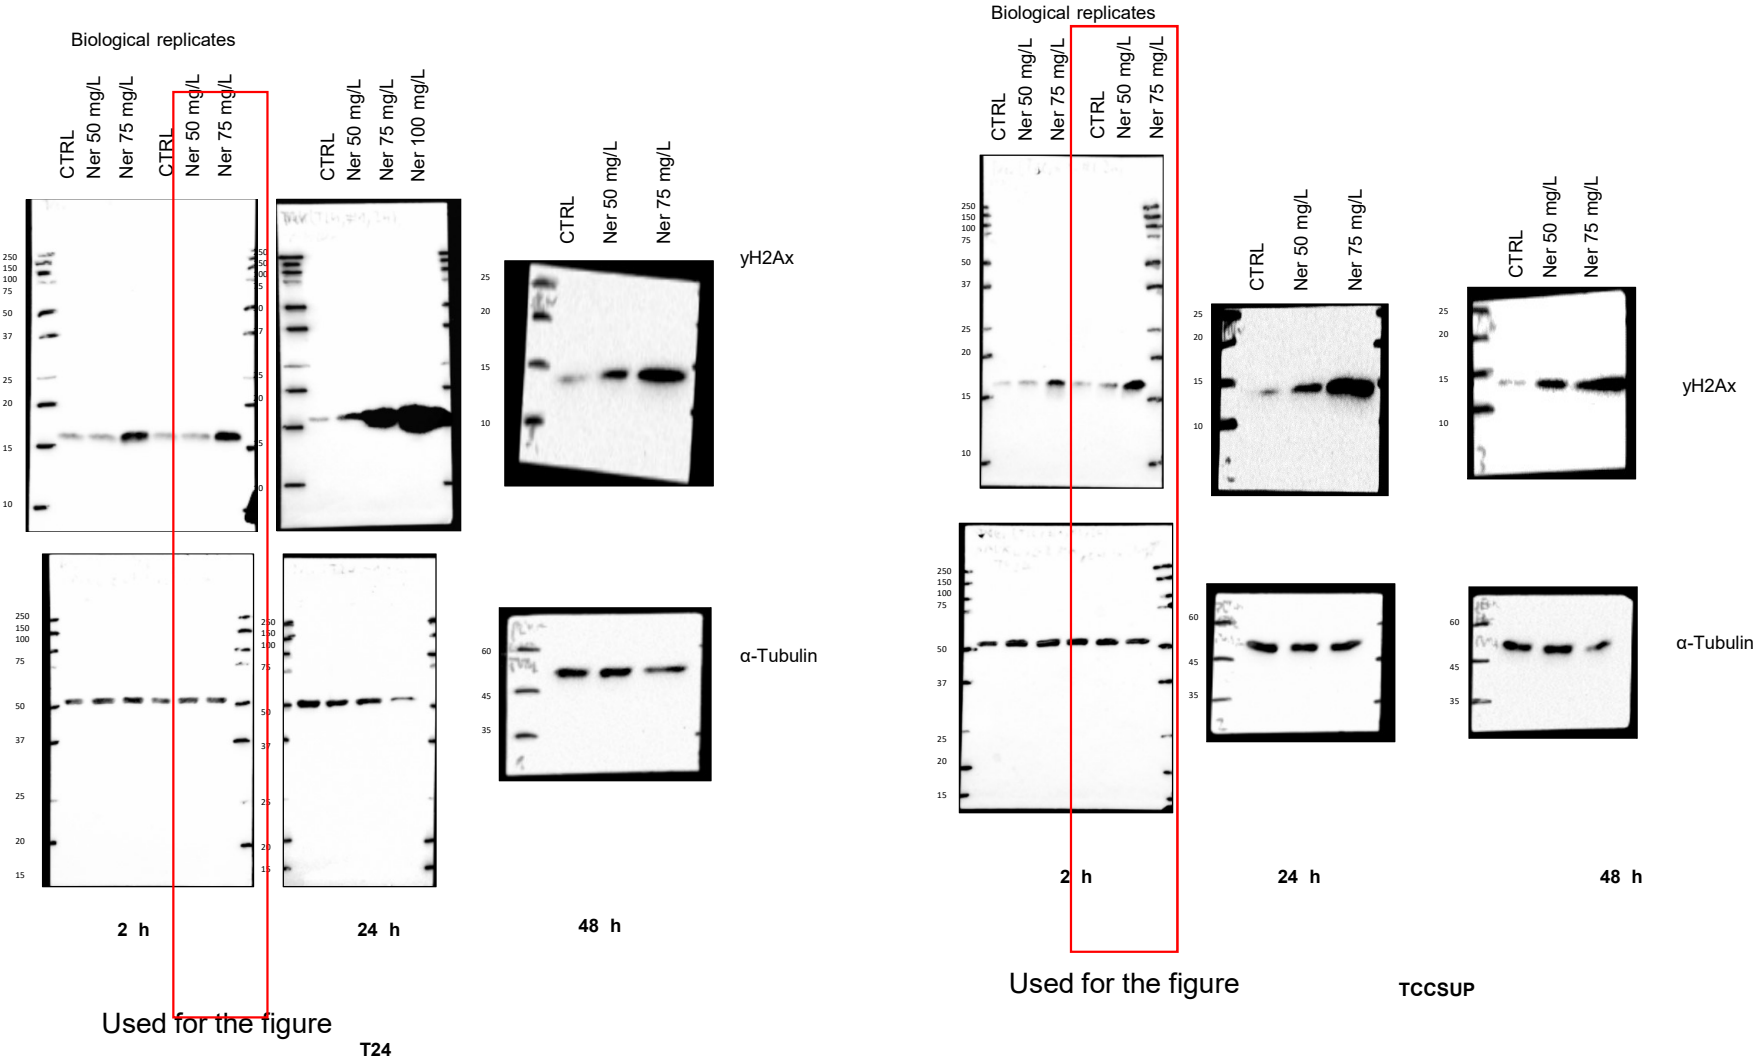

Figure S2 C

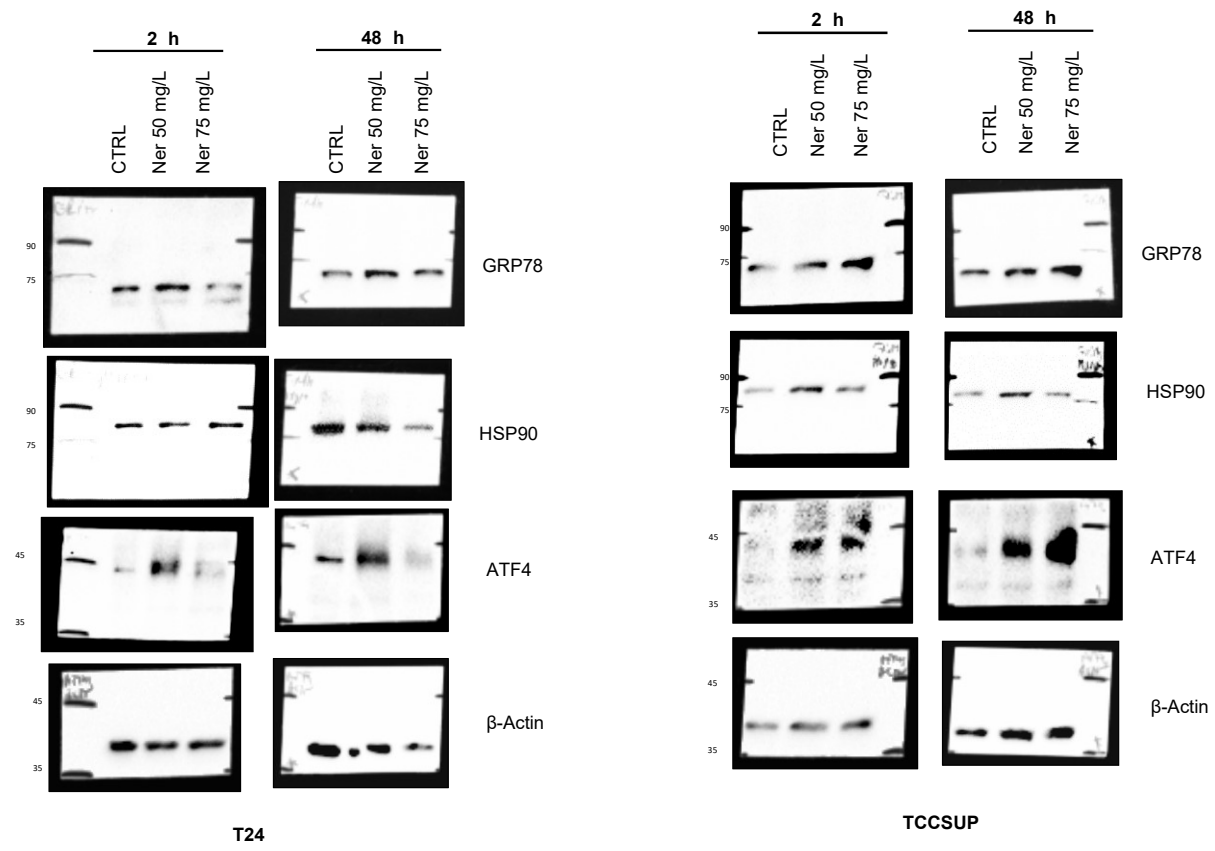

Figure S3 F

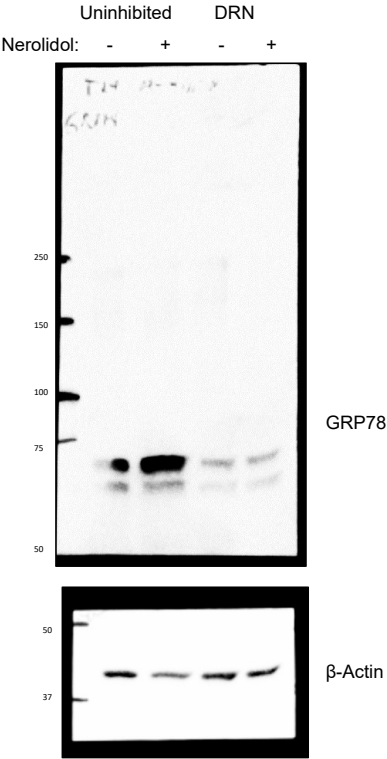

Figure S4 A

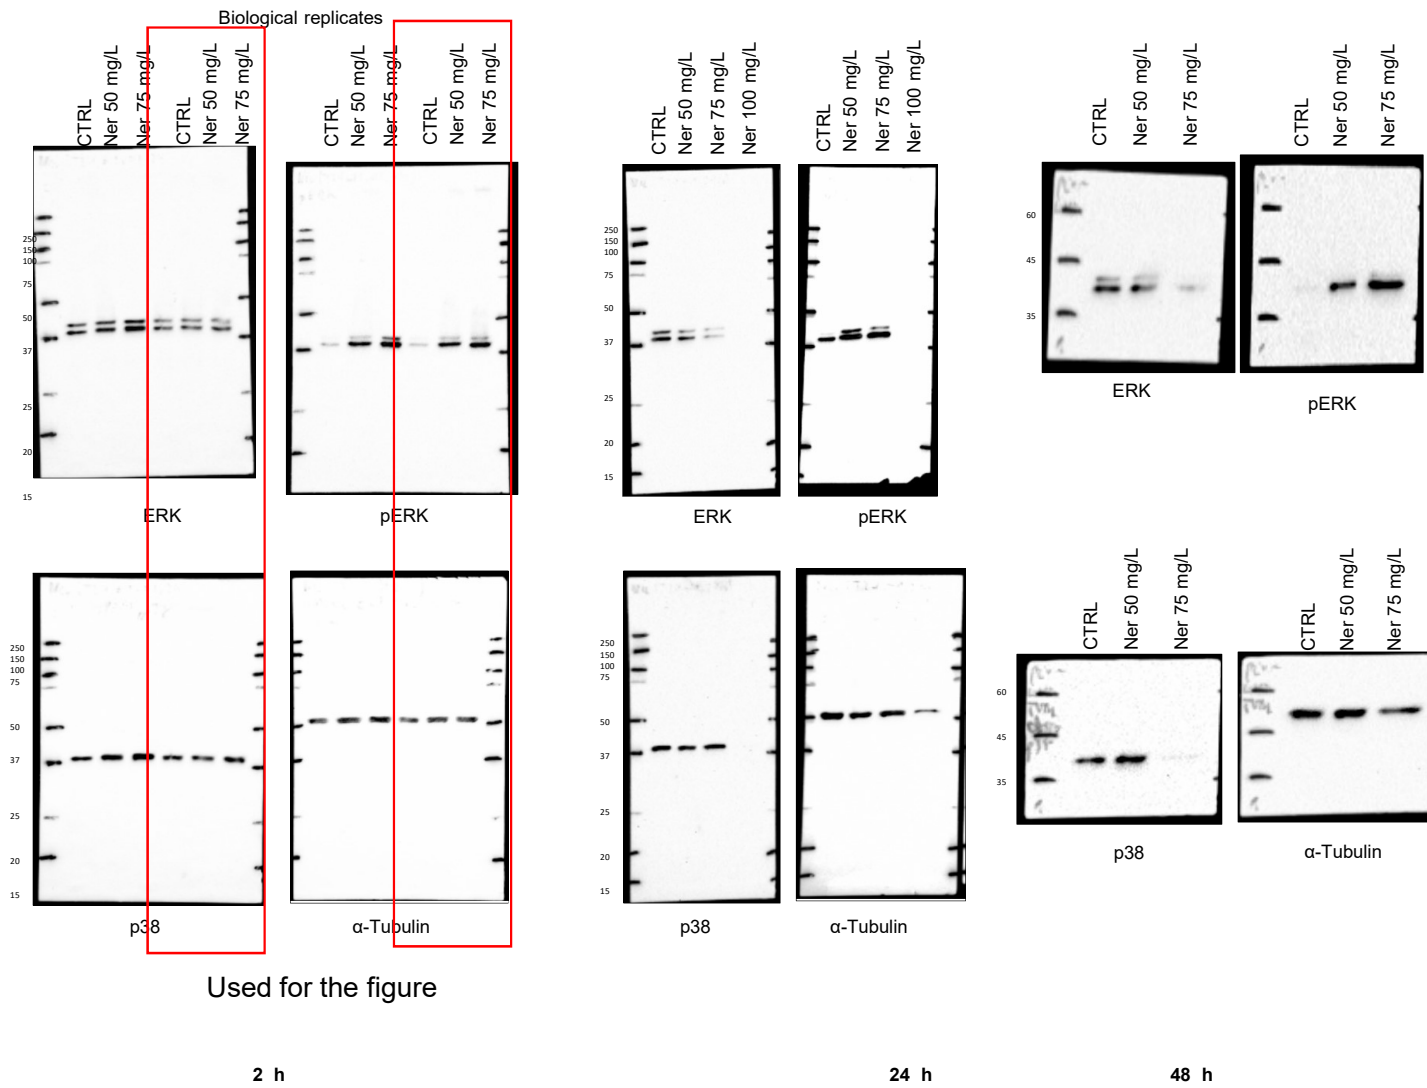

T24

Figure S4 A

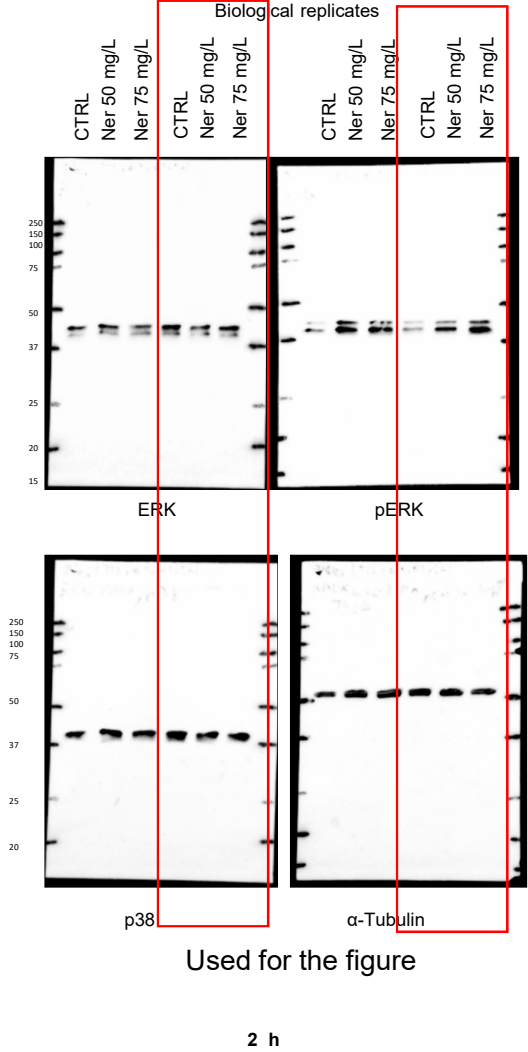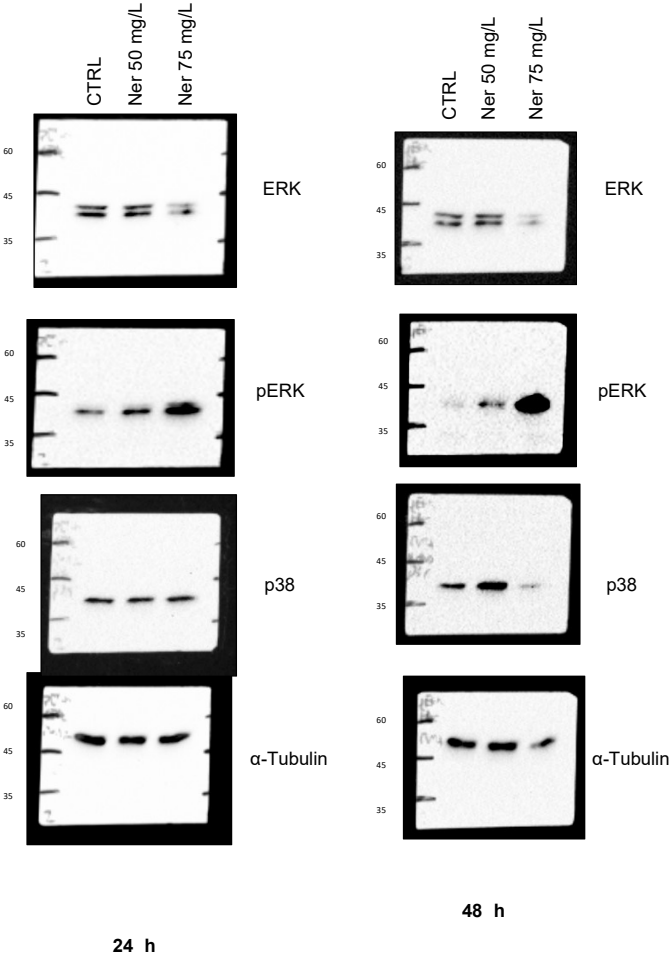



Figure S4 E

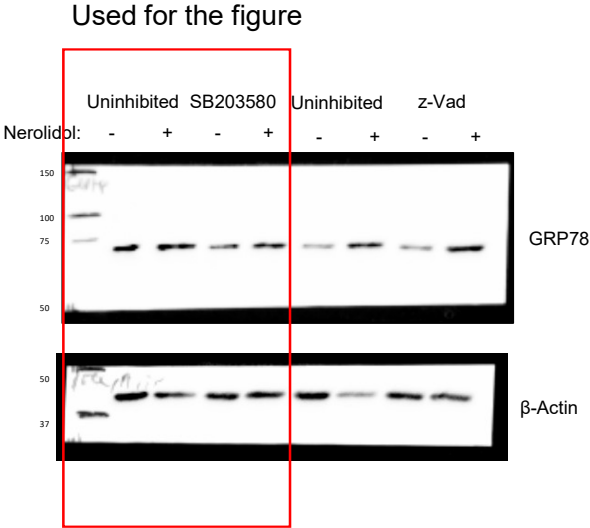

Figure S5 E

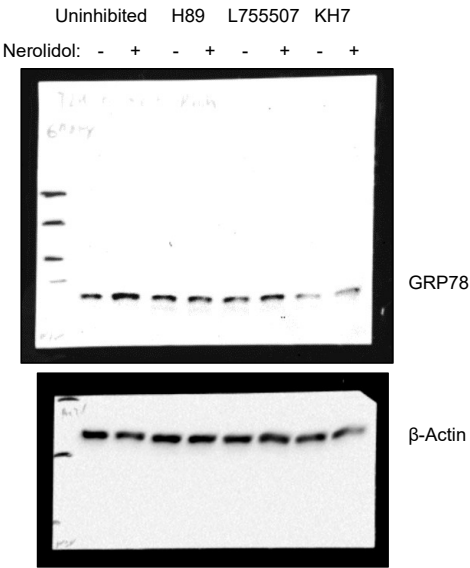

Figure S7 B

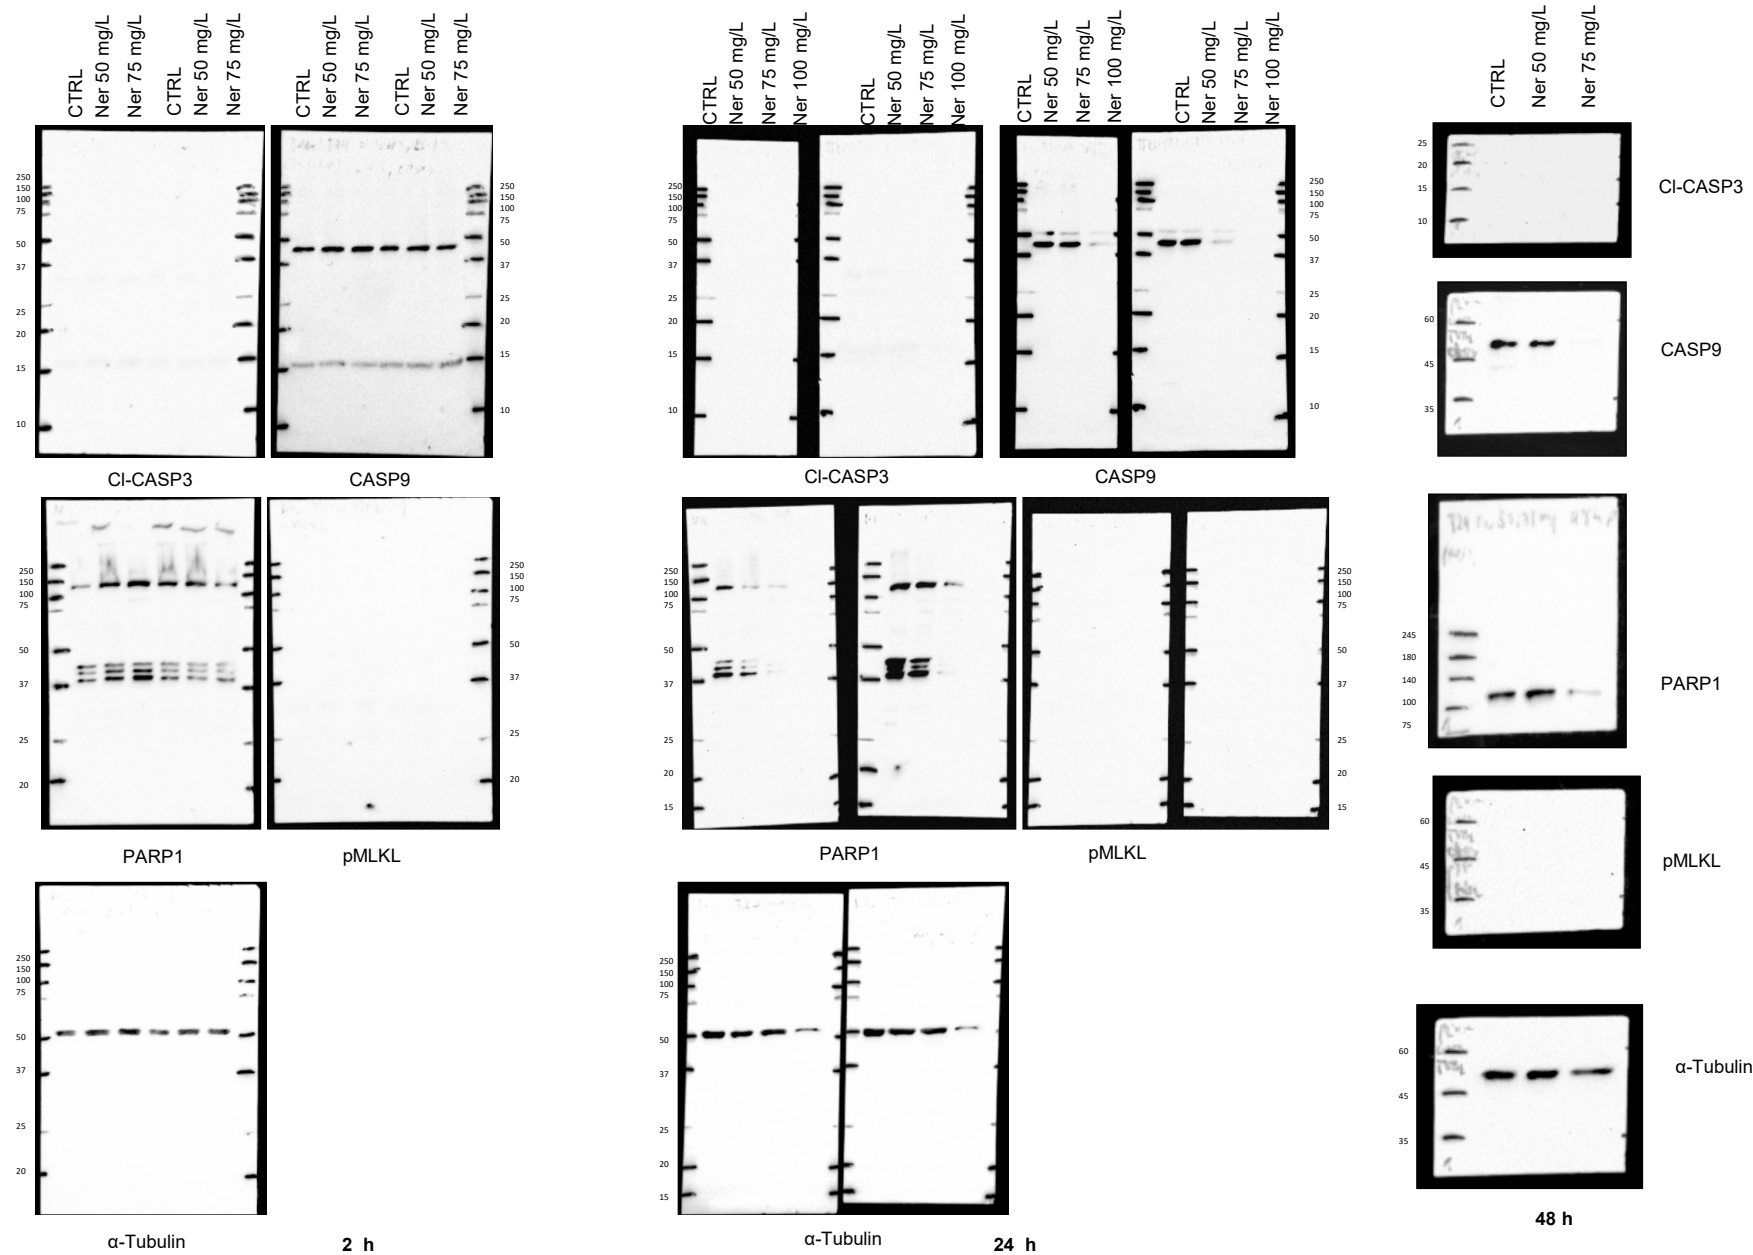

Figure S7 B

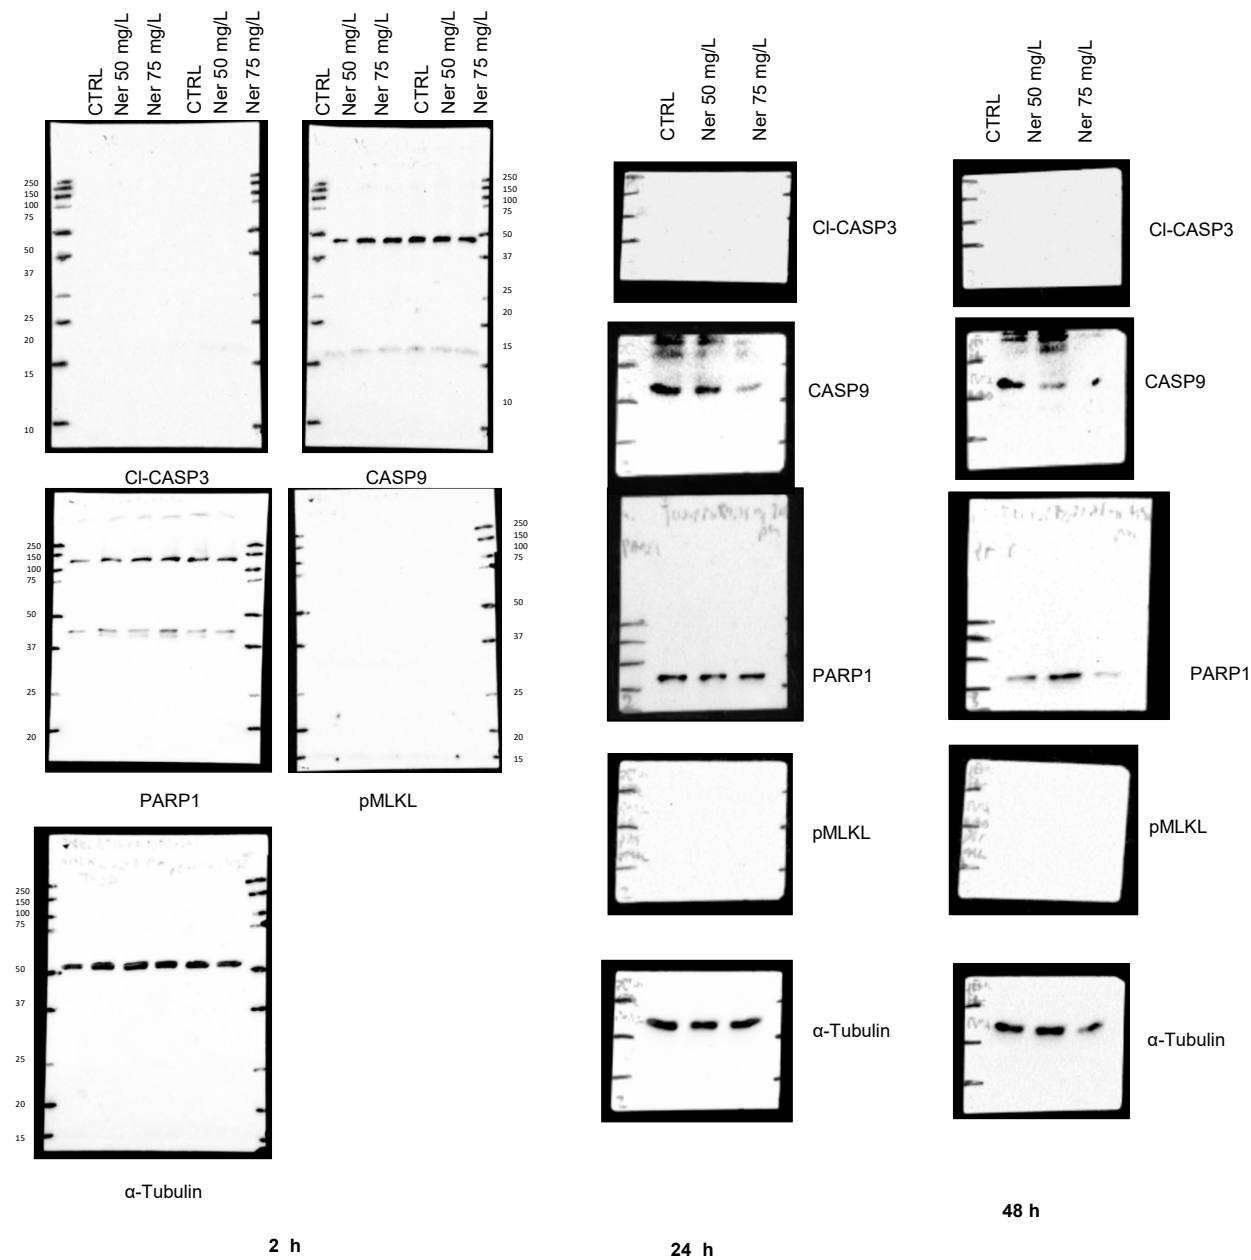

Figure S7 G

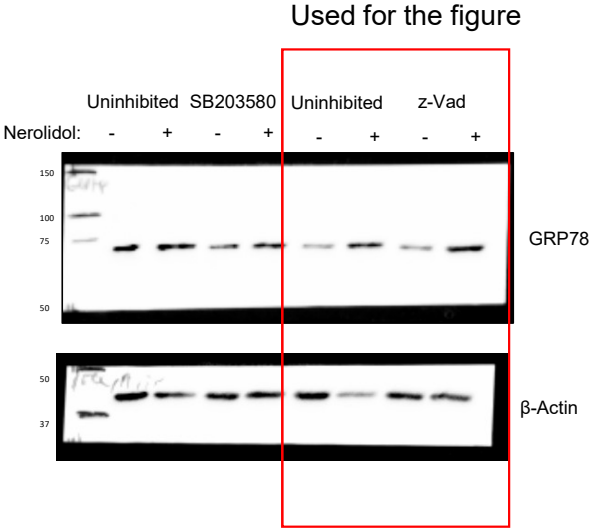

Supplement: s1 [file s1]
