# Supplementary material for: Mechanism of cis-Nerolidol-Induced Bladder Carcinoma Cell Death
Source: MDPI journal article supplement (doi:10.3390/cancers15030981), 2023-02-03
Supplement: s1 [file s1]

# Supplementary figures and tables

## Mechanism of *cis*-Nerolidol-Induced Bladder Carcinoma Cell Death

Mateo Glumac, Vedrana Čikeš Čulić, Ivana Marinović-Terzić, and Mila Radan

Figure S1. *cis*-nerolidol reduces cell viability through two cell death events with distinct cell morphologies

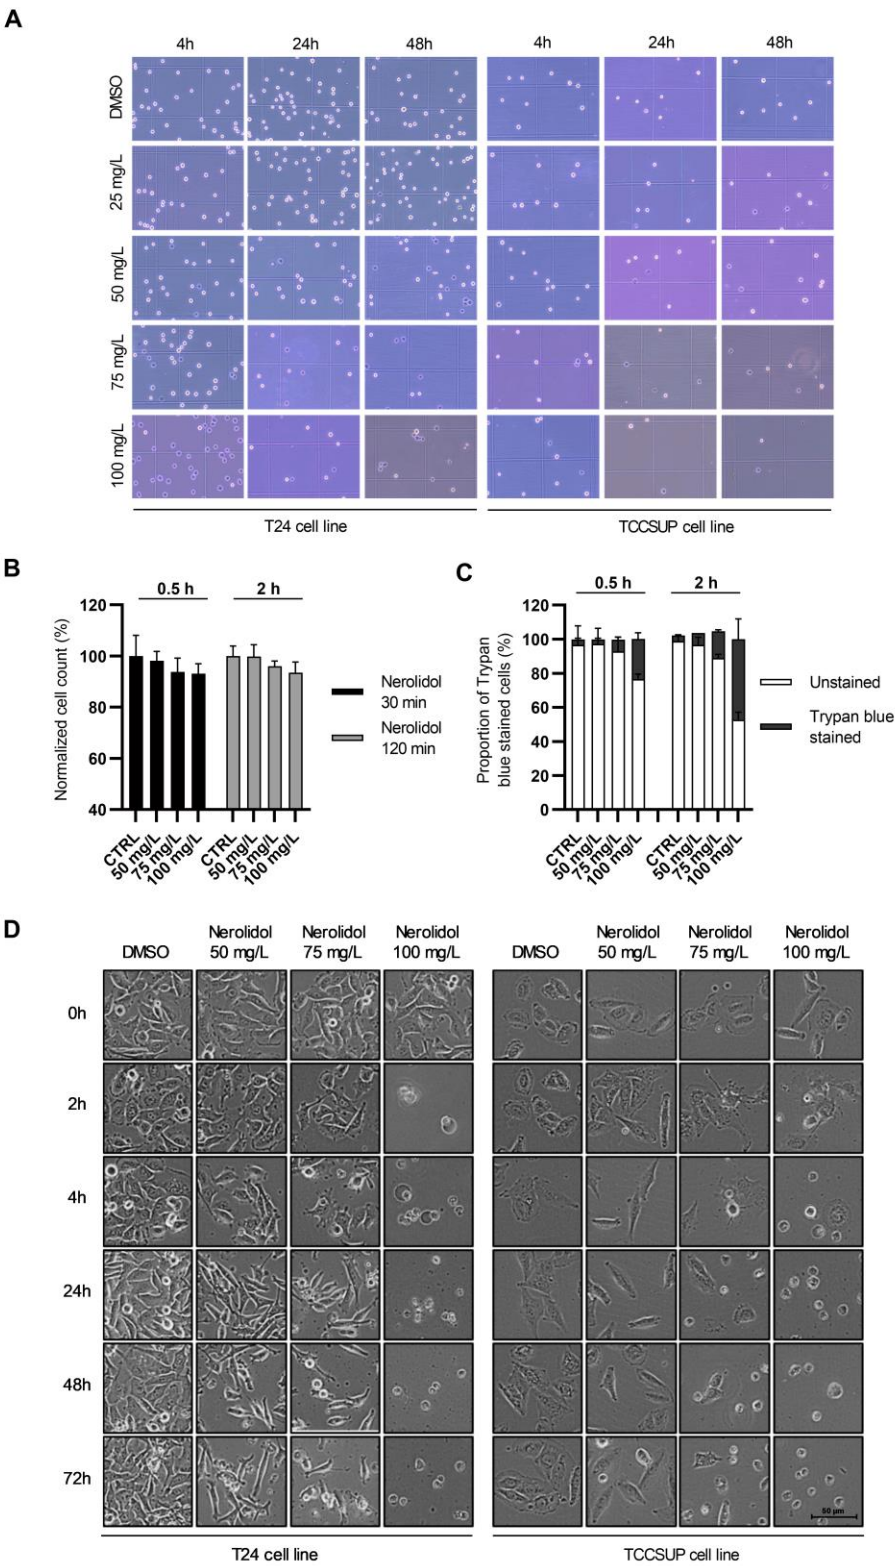

Figure S2. *cis*-nerolidol causes deregulation in ROS, ATP, and cAMP production

A

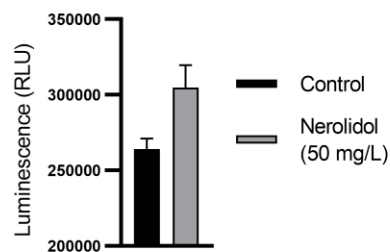

B

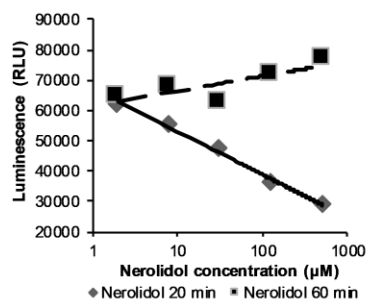

C

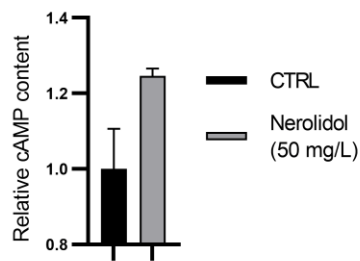

Figure S3. Short exposure to *cis*-nerolidol reduces cell proliferation and changes in cell morphology

A

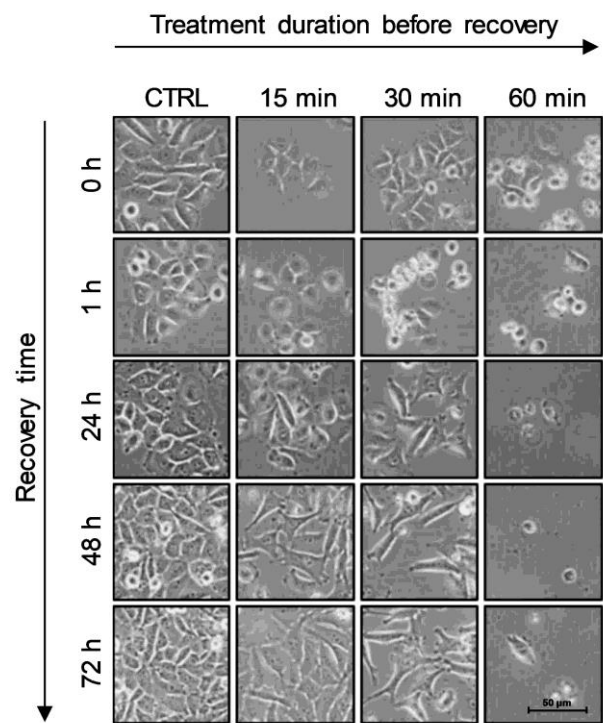

Figure S4. Signal transduction network involved in *cis*-nerolidol induced cell death

**A**

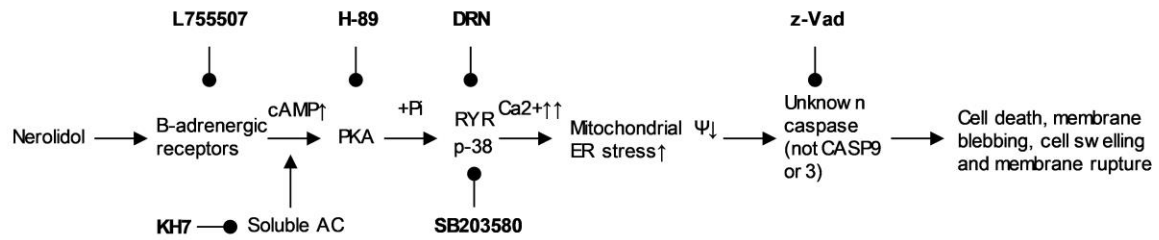

**B**

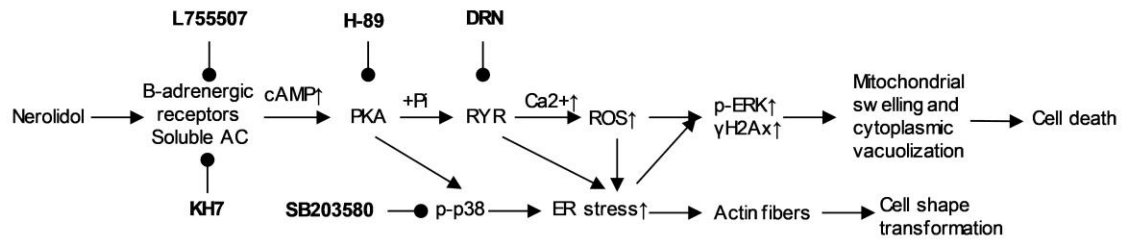

Table S1. IC<sub>50</sub> values for reduction of cell count at different time points

| <b>T24 cell line</b> | <b>4h</b> | <b>24h</b>   | <b>48h</b>   | <b>72h</b>   |
|----------------------|-----------|--------------|--------------|--------------|
| IC50 (mg/L)          | >100      | 42.82 ± 3.88 | 37.06 ± 4.22 | 25.58 ± 2.82 |

  

| <b>TCCSUP cell line</b> | <b>4h</b> | <b>24h</b>   | <b>48h</b>  | <b>72h</b>   |
|-------------------------|-----------|--------------|-------------|--------------|
| IC50 (mg/L)             | >100      | 71.92 ± 6.30 | 51.19± 7.52 | 46.59 ± 5.30 |
